# Supplementary material for: Synthesis of highly fluorescent lysine-stabilized Au nanoclusters for sensitive and selective detection of Cu2+ ion
Source: Royal Society of Chemistry journal article supplement (doi:10.1039/c3tc31398k), 2013-01-01
Supplement: c3tc31398k.pdf [file c3tc31398k.pdf]

Supplementary material (ESI) for Journal of Materials Chemistry C  
This journal is © The Royal Society of Chemistry 2013

## Electronic Supporting Information

*for*

### Synthesis of highly fluorescent Lysine-stabilized Au nanoclusters for sensitive and selective detection of Cu<sup>2+</sup> ion

Xiaoming Yang<sup>\*ab</sup>, Lei Yang<sup>ab</sup>, Yao Dou<sup>a</sup>, Shanshan Zhu<sup>a</sup>

<sup>a</sup>College of Pharmaceutical Sciences, Southwest University, Chongqing 400716, China  
Tel: (86) 23 68251225, Fax: (86) 23 68251048, E-mail: ming4444@swu.edu.cn.

<sup>b</sup>Both authors contributed equally to this work.

## Experimental Details

### Apparatus

All fluorescence measurements were performed on a Hitachi F-7000 fluorescence spectrophotometer (Tokyo, Japan) with excitation slit set at 10 nm band pass and emission at 10 nm band pass in 1 cm × 1 cm quartz cells. Meanwhile, UV/Vis absorption spectra were recorded by a Shimadzu UV-2450 spectrophotometer (Tokyo, Japan). Fourier transform infrared (FT-IR) spectra were recorded on a SHIMADZU IRprestige-21 spectrometer. The high-resolution transmission electron microscopy (HR-TEM) images were taken using a TECNAI G<sup>2</sup> F20 microscope (FEI, America) at 200 KV. Photographs were taken with an Olympus E-510 digital camera (Tokyo, Japan). A Fangzhong pHS-3C digital pH meter (Chengdu, China) was used to measure the pH values of the aqueous solutions and a vortex mixer QL-901 (Haimen, China) was used to blend the solution.

Supplementary material (ESI) for Journal of Materials Chemistry C  
This journal is © The Royal Society of Chemistry 2013

## Reagents

Hydrogen tetrachloroaurate trihydrate, lysine, bovine serum albumin, hydrazine hydrate and metal ions ( $\text{Cu}^{2+}$ ,  $\text{Fe}^{2+}$ ,  $\text{Mg}^{2+}$ ,  $\text{Mn}^{2+}$ ,  $\text{Hg}^{2+}$ ,  $\text{Zn}^{2+}$ ,  $\text{Ni}^{2+}$ ,  $\text{Co}^{2+}$ ,  $\text{Pb}^{2+}$ ,  $\text{Ba}^{2+}$ ,  $\text{Ca}^{2+}$ ,  $\text{Cd}^{2+}$ ,  $\text{Fe}^{3+}$ ,  $\text{Na}^+$  and  $\text{K}^+$ ) were obtained from Sigma-Aldrich (Milwaukee, WI). Disodium hydrogen phosphate ( $\text{Na}_2\text{HPO}_4$ ), sodium dihydrogen phosphate anhydrous ( $\text{NaH}_2\text{PO}_4$ ) and sodium chloride ( $\text{NaCl}$ ) used for preparing phosphate buffered saline (PBS) buffer were purchased from Shanghai Sangon Biotechnology Co. Ltd. (Shanghai, China). Ultrapure water, 18.25  $\text{M}\Omega\cdot\text{cm}$ , produced with an Aquapro AWL-0502-P ultrapure water system (Chongqing, China) was employed for all experiments.

## Purification

As-prepared AuNCs@Lys were purified by triple centrifugation filtration, using Nanosep filters (Pall Nanosep, Ann Arbor, MI) with a molecular weight cut-off of 3 kDa to remove impurities, and then the yellowish AuNCs@Lys remaining on the filter could be re-suspended readily in water.

## Procedure

Firstly, 100  $\mu\text{l}$  AuNCs@Lys, 100  $\mu\text{l}$  AuNCs@BSA and 50  $\mu\text{l}$  PBS buffer (pH 4) were pipetted into a 1.5-ml vial. Subsequently, an appropriate volume of  $\text{Cu}^{2+}$  working solution or sample solution was added, diluted to 500  $\mu\text{l}$  with Milli-Q purified water and vortex-mixed thoroughly. The mixture was then left to react at 45  $^\circ\text{C}$  for 15 min and transferred for fluorescence measurements.

The real samples including lake water, running water and human urine, were sampled from Chongde Lake, laboratory of college of pharmacy and Southwest University Hospital of Southwest University, respectively, and filtered with 0.22  $\mu\text{m}$  microporous membrane. Then the filtrate was used for the detection of  $\text{Cu}^{2+}$  according to the general procedure without additional special treatment.

Supplementary material (ESI) for Journal of Materials Chemistry C  
This journal is © The Royal Society of Chemistry 2013

## Figures

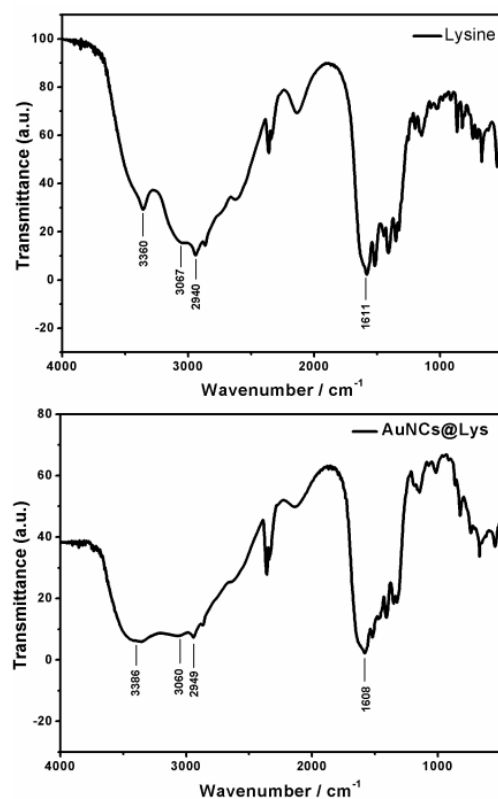

**Figure S1** FTIR spectra of Lysine and AuNCs@Lys.

**Table S1** Recoveries of Cu<sup>2+</sup> in supplemented samples detected by the proposed method.

| Samples       | Spiked (μM) | Measured (μM) | Recovery (%) | RSD (%; n=6) |
|---------------|-------------|---------------|--------------|--------------|
| Lake water    | 0           | 15.2          | —            | 2.5          |
|               | 5           | 20.6          | 108          | 2.7          |
| Running water | 0           | 0             | —            | —            |
|               | 2.5         | 2.3           | 92           | 2.5          |
| Human urine   | 0           | 0.19          | —            | 3.0          |
|               | 1           | 1.14          | 95           | 3.1          |
